# Supplementary material for: Genomic epidemiology of the first two waves of SARS-CoV-2 in Canada
Source: eLife journal article supplement (doi:10.7554/elife.73896), 2022-07-13
Supplement: supp3 [file elife-73896-supp3-v1.pdf]

### Supplementary File 3. Supplemental tables from subsampling sensitivity analysis

McLaughlin, A., Montoya, V., Miller, R. L., Mordecai, G. J., Canadian COVID-19 Genomics Network Consortium (CanCOGen), Worobey, M., Poon, A. F. Y., & Joy, J. B. (2022). Genomic epidemiology of the first two waves of SARS-CoV-2 in Canada. eLife. <https://doi.org/10.7554/eLife.73896>

**Supplementary File 3a.** Number of Canadian and global sequences available and subsampled in the four subsampling strategies, where 25-100% of Canadian sequences were retained.

| Month        | n Canadian sequences sampled |       |       |       | n Canadian sequences available | n global sequences sampled |       |       |       | n global sequences available |
|--------------|------------------------------|-------|-------|-------|--------------------------------|----------------------------|-------|-------|-------|------------------------------|
|              | 25%                          | 50%   | 75%   | 100%  |                                | 25%                        | 50%   | 75%   | 100%  |                              |
| 2019-12      | 0                            | 0     | 0     | 0     | 0                              | 21                         | 21    | 21    | 21    | 21                           |
| 2020-01      | 5                            | 5     | 5     | 5     | 5                              | 465                        | 465   | 465   | 465   | 465                          |
| 2020-02      | 15                           | 15    | 15    | 15    | 15                             | 1360                       | 1360  | 1360  | 983   | 1360                         |
| 2020-03      | 774                          | 1735  | 3186  | 3347  | 3347                           | 3248                       | 2483  | 1717  | 983   | 44447                        |
| 2020-04      | 774                          | 1735  | 3186  | 4473  | 4473                           | 3248                       | 2483  | 1717  | 983   | 44634                        |
| 2020-05      | 774                          | 1735  | 1821  | 1821  | 1821                           | 3248                       | 2482  | 1717  | 983   | 22810                        |
| 2020-06      | 761                          | 761   | 761   | 761   | 761                            | 3248                       | 2482  | 1717  | 983   | 25879                        |
| 2020-07      | 667                          | 667   | 667   | 667   | 667                            | 3248                       | 2482  | 1717  | 983   | 29702                        |
| 2020-08      | 774                          | 1358  | 1358  | 1358  | 1358                           | 3248                       | 2482  | 1717  | 983   | 33172                        |
| 2020-09      | 774                          | 1684  | 1684  | 1684  | 1684                           | 3247                       | 2482  | 1717  | 983   | 34353                        |
| 2020-10      | 774                          | 1735  | 2127  | 2127  | 2127                           | 3247                       | 2482  | 1717  | 983   | 56902                        |
| 2020-11      | 773                          | 1735  | 3186  | 4240  | 4240                           | 3247                       | 2482  | 1717  | 983   | 80464                        |
| 2020-12      | 773                          | 1735  | 3186  | 3585  | 3585                           | 3247                       | 2482  | 1717  | 983   | 111794                       |
| 2021-01      | 773                          | 1734  | 3185  | 6125  | 6125                           | 3247                       | 2482  | 1716  | 983   | 189984                       |
| 2021-02      | 773                          | 1734  | 3185  | 6528  | 6528                           | 3247                       | 2482  | 1716  | 982   | 217196                       |
| <b>TOTAL</b> | 9184                         | 18368 | 27552 | 36736 | 36736                          | 40816                      | 31632 | 22448 | 13264 | 893183                       |

**Supplementary File 3b.** Total number of cases, sequences available, and sequences sampled by region and by subsampling strategy with 25-100% Canadian sequences retained in a representative bootstrap.

| Region           | n cases   | n clean seq. available |            |            |             |       |
|------------------|-----------|------------------------|------------|------------|-------------|-------|
|                  |           | n seq. 25%             | n seq. 50% | n seq. 75% | n seq. 100% |       |
| USA              | 28747597  | 231535                 | 13369      | 9721       | 6360        | 3367  |
| Europe           | 16786160  | 179488                 | 4138       | 3131       | 2282        | 1345  |
| India            | 11112241  | 11217                  | 3613       | 3058       | 2192        | 1236  |
| Brazil           | 10558091  | 6278                   | 2672       | 2313       | 1780        | 1122  |
| Asia             | 9058898   | 56922                  | 2918       | 2342       | 1783        | 1134  |
| Latin America    | 7404854   | 6020                   | 1696       | 1367       | 1001        | 591   |
| Russia           | 4198400   | 2569                   | 1301       | 1021       | 758         | 480   |
| United Kingdom   | 4188823   | 290323                 | 1765       | 1349       | 935         | 489   |
| France           | 3815688   | 12898                  | 1581       | 1144       | 827         | 511   |
| Spain            | 3188553   | 19382                  | 1766       | 1311       | 862         | 432   |
| Italy            | 2925292   | 9744                   | 1406       | 1147       | 836         | 573   |
| Africa           | 2567496   | 7630                   | 549        | 400        | 293         | 173   |
| Germany          | 2442336   | 30446                  | 1088       | 829        | 562         | 340   |
| Mexico           | 2086938   | 3806                   | 785        | 640        | 438         | 250   |
| Iran             | 1631169   | 129                    | 95         | 91         | 91          | 74    |
| South Africa     | 1513393   | 5173                   | 725        | 523        | 332         | 184   |
| Peru             | 1323863   | 1225                   | 518        | 427        | 326         | 193   |
| China            | 109017    | 936                    | 757        | 753        | 743         | 745   |
| Oceania          | 32717     | 17274                  | 74         | 64         | 47          | 25    |
| Ontario          | 300813    | 12450                  | 3577       | 6637       | 10011       | 12450 |
| Quebec           | 287740    | 7710                   | 3052       | 5306       | 7303        | 7710  |
| Alberta          | 129347    | 4342                   | 646        | 1438       | 2369        | 4342  |
| British Columbia | 80454     | 9376                   | 1388       | 3906       | 6137        | 9376  |
| Manitoba         | 31859     | 1235                   | 420        | 732        | 1055        | 1235  |
| Saskatchewan     | 14244     | 193                    | 38         | 114        | 162         | 193   |
| Maritimes        | 4058      | 1430                   | 63         | 235        | 515         | 1430  |
| <b>TOTAL</b>     | 114540041 | 929731                 | 50000      | 49999      | 50000       | 50000 |

**Supplementary File 3c.** For each of the four subsampling strategies with 25-100% of Canadian data subsampled, ten bootstrap datasets were summarized by the number of tips pruned from the initial maximum likelihood trees as temporal outliers based on having residuals further than the mean +/- 3 standard deviations of residuals in the linear regression of evolutionary divergence over time, or based on having more than 12 mutations on the pendant edge (final branch) leading to the tip. The slope of the strict clock rate models before and after removing outliers are reported with linear model R<sup>2</sup> values.

| Subsampling strategy          | Boot-strap | Initial n tips | Initial strict clock rate (s/s/y) | Initial R <sup>2</sup> | Tips excl., residuals | Tips excl., pendant edge | Final strict clock rate (s/s/y) | Final R <sup>2</sup> | Final n tips |
|-------------------------------|------------|----------------|-----------------------------------|------------------------|-----------------------|--------------------------|---------------------------------|----------------------|--------------|
| 25%                           | 1          | 50,000         | 9.21E-04                          | 0.564                  | 1851                  | 683                      | 7.40E-04                        | 0.676                | 47,466       |
| 25%                           | 2          | 50,000         | 8.84E-04                          | 0.589                  | 590                   | 712                      | 8.37E-04                        | 0.672                | 48,698       |
| 25%                           | 3          | 50,000         | 8.53E-04                          | 0.650                  | 266                   | 663                      | 8.37E-04                        | 0.689                | 49,071       |
| 25%                           | 4          | 50,000         | 7.92E-04                          | 0.370                  | 1093                  | 688                      | 6.77E-04                        | 0.381                | 48,219       |
| 25%                           | 5          | 50,000         | 9.12E-04                          | 0.584                  | 1279                  | 689                      | 8.04E-04                        | 0.638                | 48,032       |
| 25%                           | 6          | 50,000         | 7.28E-04                          | 0.472                  | 369                   | 678                      | 7.03E-04                        | 0.501                | 48,953       |
| 25%                           | 7          | 50,000         | 1.05E-03                          | 0.443                  | 1941                  | 686                      | 7.37E-04                        | 0.629                | 47,373       |
| 25%                           | 8          | 50,000         | 7.89E-04                          | 0.565                  | 94                    | 704                      | 7.81E-04                        | 0.661                | 49,202       |
| 25%                           | 9          | 50,000         | 8.37E-04                          | 0.552                  | 260                   | 677                      | 8.19E-04                        | 0.674                | 49,063       |
| 25%                           | 10         | 50,000         | 8.14E-04                          | 0.651                  | 468                   | 638                      | 7.83E-04                        | 0.696                | 48,894       |
| 50%                           | 1          | 50,000         | 8.30E-04                          | 0.641                  | 636                   | 542                      | 7.85E-04                        | 0.687                | 48,822       |
| 50%                           | 2          | 50,000         | 8.59E-04                          | 0.563                  | 645                   | 529                      | 8.02E-04                        | 0.667                | 48,826       |
| 50%                           | 3          | 50,000         | 8.84E-04                          | 0.579                  | 1514                  | 504                      | 7.38E-04                        | 0.684                | 47,982       |
| 50%                           | 4          | 50,000         | 8.28E-04                          | 0.579                  | 727                   | 518                      | 7.70E-04                        | 0.661                | 48,755       |
| 50%                           | 5          | 50,000         | 8.34E-04                          | 0.575                  | 106                   | 515                      | 8.25E-04                        | 0.689                | 49,379       |
| 50%                           | 6          | 50,000         | 8.56E-04                          | 0.570                  | 1435                  | 522                      | 7.16E-04                        | 0.656                | 48,043       |
| 50%                           | 7          | 50,000         | 6.83E-04                          | 0.428                  | 112                   | 567                      | 6.75E-04                        | 0.529                | 49,321       |
| 50%                           | 8          | 50,000         | 7.47E-04                          | 0.486                  | 432                   | 494                      | 7.16E-04                        | 0.502                | 49,074       |
| 50%                           | 9          | 50,000         | 8.85E-04                          | 0.580                  | 1426                  | 535                      | 7.47E-04                        | 0.689                | 48,039       |
| 50%                           | 10         | 50,000         | 7.68E-04                          | 0.528                  | 1130                  | 572                      | 6.74E-04                        | 0.577                | 48,298       |
| 75%                           | 1          | 50,000         | 7.56E-04                          | 0.667                  | 318                   | 402                      | 7.36E-04                        | 0.700                | 49,280       |
| 75%                           | 2          | 50,000         | 7.88E-04                          | 0.621                  | 899                   | 408                      | 7.17E-04                        | 0.684                | 48,693       |
| 75%                           | 3          | 50,000         | 7.54E-04                          | 0.653                  | 363                   | 414                      | 7.31E-04                        | 0.694                | 49,223       |
| 75%                           | 4          | 50,000         | 8.24E-04                          | 0.596                  | 1249                  | 452                      | 7.09E-04                        | 0.689                | 48,299       |
| 75%                           | 5          | 50,000         | 7.73E-04                          | 0.646                  | 127                   | 381                      | 7.66E-04                        | 0.698                | 49,492       |
| 75%                           | 6          | 50,000         | 8.02E-04                          | 0.641                  | 1015                  | 436                      | 7.22E-04                        | 0.706                | 48,549       |
| 75%                           | 7          | 50,000         | 7.05E-04                          | 0.484                  | 464                   | 399                      | 6.70E-04                        | 0.533                | 49,137       |
| 75%                           | 8          | 50,000         | 7.58E-04                          | 0.627                  | 420                   | 428                      | 7.28E-04                        | 0.692                | 49,152       |
| 75%                           | 9          | 50,000         | 7.91E-04                          | 0.655                  | 400                   | 396                      | 7.64E-04                        | 0.696                | 49,204       |
| 75%                           | 10         | 50,000         | 7.99E-04                          | 0.436                  | 1460                  | 382                      | 6.12E-04                        | 0.538                | 48,158       |
| 100%                          | 1          | 50,000         | 7.53E-04                          | 0.616                  | 417                   | 345                      | 7.27E-04                        | 0.665                | 49,238       |
| 100%                          | 2          | 50,000         | 7.49E-04                          | 0.663                  | 175                   | 409                      | 7.40E-04                        | 0.691                | 49,416       |
| 100%                          | 3          | 50,000         | 7.22E-04                          | 0.653                  | 85                    | 371                      | 7.17E-04                        | 0.675                | 49,544       |
| 100%                          | 4          | 50,000         | 7.43E-04                          | 0.684                  | 22                    | 389                      | 7.43E-04                        | 0.704                | 49,589       |
| 100%                          | 5          | 50,000         | 7.69E-04                          | 0.603                  | 760                   | 380                      | 7.09E-04                        | 0.656                | 48,860       |
| 100%                          | 6          | 50,000         | 7.25E-04                          | 0.579                  | 223                   | 374                      | 7.08E-04                        | 0.666                | 49,403       |
| 100%                          | 7          | 50,000         | 7.40E-04                          | 0.650                  | 270                   | 387                      | 7.24E-04                        | 0.683                | 49,343       |
| 100%                          | 8          | 50,000         | 7.40E-04                          | 0.653                  | 169                   | 373                      | 7.30E-04                        | 0.693                | 49,458       |
| 100%                          | 9          | 50,000         | 7.83E-04                          | 0.610                  | 42                    | 375                      | 7.78E-04                        | 0.686                | 49,583       |
| 100%                          | 10         | 50,000         | 7.22E-04                          | 0.646                  | 72                    | 386                      | 7.19E-04                        | 0.690                | 49,542       |
| <b>Mean for each strategy</b> |            |                |                                   |                        |                       |                          |                                 |                      |              |
| 25%                           | Mean       | 50,000         | 8.58E-04                          | 0.544                  | 821.1                 | 681.8                    | 7.72E-04                        | 0.622                | 48,497       |
| 50%                           | Mean       | 50,000         | 8.17E-04                          | 0.553                  | 816.3                 | 529.8                    | 7.45E-04                        | 0.634                | 48,654       |
| 75%                           | Mean       | 50,000         | 7.75E-04                          | 0.603                  | 671.5                 | 409.8                    | 7.16E-04                        | 0.663                | 48,919       |
| 100%                          | Mean       | 50,000         | 7.45E-04                          | 0.636                  | 223.5                 | 378.9                    | 7.30E-04                        | 0.681                | 49,398       |

**Supplementary File 3d.** For each of the four subsampling strategies with 25-100% of Canadian data subsampled, and for each of ten bootstrap datasets, maximum likelihood trees were time-scaled using LSD2 in IQTREE-2 under a relaxed log normal clock with 0.2 relative variance. The mean and 95% confidence interval (CI) of the mean relaxed clock rate and the time of most recent common ancestor (TMRCA) are reported and summarized by strategy.

| Strategy                      | Bootstrap | Strict clock rate | Relaxed clock rate |              |          | TMRCA        |              |            |
|-------------------------------|-----------|-------------------|--------------------|--------------|----------|--------------|--------------|------------|
|                               |           | Mean              | Lower 95% CI       | Upper 95% CI | Mean     | Lower 95% CI | Upper 95% CI |            |
| 25%                           | 1         | 7.40E-04          | 2.81E-04           | 2.77E-04     | 2.85E-04 | 2019-12-23   | 2019-12-03   | 2019-12-24 |
| 25%                           | 2         | 8.37E-04          | 2.91E-04           | 2.86E-04     | 2.94E-04 | 2019-12-24   | 2019-11-28   | 2019-12-24 |
| 25%                           | 3         | 8.37E-04          | 2.87E-04           | 2.81E-04     | 2.90E-04 | 2019-12-24   | 2019-11-19   | 2019-12-24 |
| 25%                           | 4         | 6.77E-04          | 2.97E-04           | 2.94E-04     | 3.01E-04 | 2019-12-24   | 2019-12-01   | 2019-12-24 |
| 25%                           | 5         | 8.04E-04          | NA                 | NA           | NA       | NA           | NA           | NA         |
| 25%                           | 6         | 7.03E-04          | 2.89E-04           | 2.85E-04     | 2.94E-04 | 2019-12-24   | 2019-11-30   | 2019-12-24 |
| 25%                           | 7         | 7.37E-04          | 2.86E-04           | 2.81E-04     | 2.90E-04 | 2019-12-23   | 2019-11-29   | 2019-12-24 |
| 25%                           | 8         | 7.81E-04          | 2.86E-04           | 2.82E-04     | 2.89E-04 | 2019-12-24   | 2019-11-28   | 2019-12-24 |
| 25%                           | 9         | 8.19E-04          | 2.90E-04           | 2.85E-04     | 2.94E-04 | 2019-12-24   | 2019-12-06   | 2019-12-24 |
| 25%                           | 10        | 7.83E-04          | 2.89E-04           | 2.85E-04     | 2.93E-04 | 2019-12-24   | 2019-12-01   | 2019-12-24 |
| 50%                           | 1         | 7.85E-04          | 2.92E-04           | 2.87E-04     | 2.97E-04 | 2019-12-23   | 2019-11-29   | 2019-12-24 |
| 50%                           | 2         | 8.02E-04          | 2.89E-04           | 2.86E-04     | 2.95E-04 | 2019-12-24   | 2019-12-04   | 2019-12-24 |
| 50%                           | 3         | 7.38E-04          | 2.85E-04           | 2.82E-04     | 2.91E-04 | 2019-12-24   | 2019-11-26   | 2019-12-24 |
| 50%                           | 4         | 7.70E-04          | 2.94E-04           | 2.91E-04     | 2.97E-04 | 2019-12-24   | 2019-12-05   | 2019-12-24 |
| 50%                           | 5         | 8.25E-04          | 2.88E-04           | 2.84E-04     | 2.93E-04 | 2019-12-24   | 2019-12-06   | 2019-12-24 |
| 50%                           | 6         | 7.16E-04          | 2.91E-04           | 2.88E-04     | 2.95E-04 | 2019-12-23   | 2019-12-01   | 2019-12-24 |
| 50%                           | 7         | 6.75E-04          | 2.84E-04           | 2.80E-04     | 2.88E-04 | 2019-12-22   | 2019-12-01   | 2019-12-22 |
| 50%                           | 8         | 7.16E-04          | 2.97E-04           | 2.95E-04     | 3.03E-04 | 2019-12-24   | 2019-12-03   | 2019-12-24 |
| 50%                           | 9         | 7.47E-04          | 2.97E-04           | 2.94E-04     | 3.03E-04 | 2019-12-24   | 2019-12-02   | 2019-12-24 |
| 50%                           | 10        | 6.74E-04          | 2.95E-04           | 2.92E-04     | 3.01E-04 | 2019-12-24   | 2019-11-30   | 2019-12-24 |
| 75%                           | 1         | 7.36E-04          | 2.80E-04           | 2.78E-04     | 2.88E-04 | 2019-12-20   | 2019-11-18   | 2019-12-22 |
| 75%                           | 2         | 7.17E-04          | 2.87E-04           | 2.84E-04     | 2.93E-04 | 2019-12-23   | 2019-12-03   | 2019-12-24 |
| 75%                           | 3         | 7.31E-04          | 2.82E-04           | 2.81E-04     | 2.89E-04 | 2019-12-21   | 2019-11-25   | 2019-12-23 |
| 75%                           | 4         | 7.09E-04          | 2.91E-04           | 2.89E-04     | 2.98E-04 | 2019-12-24   | 2019-12-01   | 2019-12-24 |
| 75%                           | 5         | 7.66E-04          | 2.84E-04           | 2.81E-04     | 2.90E-04 | 2019-12-22   | 2019-11-27   | 2019-12-24 |
| 75%                           | 6         | 7.22E-04          | 2.90E-04           | 2.88E-04     | 2.97E-04 | 2019-12-23   | 2019-11-30   | 2019-12-24 |
| 75%                           | 7         | 6.70E-04          | 2.82E-04           | 2.79E-04     | 2.87E-04 | 2019-12-21   | 2019-11-09   | 2019-12-22 |
| 75%                           | 8         | 7.28E-04          | 2.85E-04           | 2.83E-04     | 2.90E-04 | 2019-12-23   | 2019-11-16   | 2019-12-24 |
| 75%                           | 9         | 7.64E-04          | 2.86E-04           | 2.83E-04     | 2.92E-04 | 2019-12-22   | 2019-11-27   | 2019-12-23 |
| 75%                           | 10        | 6.12E-04          | 2.94E-04           | 2.92E-04     | 3.00E-04 | 2019-12-23   | 2019-11-27   | 2019-12-24 |
| 100%                          | 1         | 7.27E-04          | 2.79E-04           | 2.77E-04     | 2.88E-04 | 2019-12-15   | 2019-11-14   | 2019-12-18 |
| 100%                          | 2         | 7.40E-04          | 2.92E-04           | 2.89E-04     | 3.02E-04 | 2019-12-17   | 2019-10-23   | 2019-12-19 |
| 100%                          | 3         | 7.17E-04          | 2.85E-04           | 2.84E-04     | 2.95E-04 | 2019-12-17   | 2019-11-19   | 2019-12-19 |
| 100%                          | 4         | 7.43E-04          | 2.84E-04           | 2.82E-04     | 2.93E-04 | 2019-12-16   | 2019-11-21   | 2019-12-19 |
| 100%                          | 5         | 7.09E-04          | 2.84E-04           | 2.84E-04     | 2.93E-04 | 2019-12-15   | 2019-10-26   | 2019-12-18 |
| 100%                          | 6         | 7.08E-04          | 2.69E-04           | 2.69E-04     | 2.77E-04 | 2019-12-14   | 2019-11-12   | 2019-12-16 |
| 100%                          | 7         | 7.24E-04          | 2.96E-04           | 2.95E-04     | 3.04E-04 | 2019-12-19   | 2019-11-25   | 2019-12-22 |
| 100%                          | 8         | 7.30E-04          | 2.65E-04           | 2.64E-04     | 2.73E-04 | 2019-12-15   | 2019-11-10   | 2019-12-17 |
| 100%                          | 9         | 7.78E-04          | 2.65E-04           | 2.64E-04     | 2.72E-04 | 2019-12-14   | 2019-11-24   | 2019-12-17 |
| 100%                          | 10        | 7.19E-04          | 2.62E-04           | 2.62E-04     | 2.70E-04 | 2019-12-14   | 2019-11-23   | 2019-12-17 |
| <b>Mean for each strategy</b> |           |                   |                    |              |          |              |              |            |
| 25%                           | Mean      | 7.72E-04          | 2.89E-04           | 2.84E-04     | 2.92E-04 | 2019-12-24   | 2019-11-29   | 2019-12-24 |
| 50%                           | Mean      | 7.45E-04          | 2.91E-04           | 2.88E-04     | 2.96E-04 | 2019-12-24   | 2019-12-01   | 2019-12-24 |
| 75%                           | Mean      | 7.15E-04          | 2.86E-04           | 2.84E-04     | 2.92E-04 | 2019-12-22   | 2019-11-24   | 2019-12-23 |
| 100%                          | Mean      | 7.30E-04          | 2.78E-04           | 2.77E-04     | 2.87E-04 | 2019-12-17   | 2019-11-13   | 2019-12-19 |
